# Supplementary material for: Effects of alumina morphology on dry reforming of methane over Ni/Al2O3 catalysts
Source: Royal Society of Chemistry journal article supplement (doi:10.1039/c9cy02093d), 2019-12-16
Supplement: c9cy02093d1.pdf [file c9cy02093d1.pdf]

Electronic Supplementary Material (ESI) for Catalysis Science & Technology.  
This journal is © The Royal Society of Chemistry 2019

## Supporting Information

### Effects of alumina morphology on dry reforming of methane over Ni/Al<sub>2</sub>O<sub>3</sub> catalysts

Dongyang Shen, Miaomiao Huo, Lin Li\*, Shuai Lyu, Juhua Wang, Xiaoyan Wang,  
Yuhua Zhang, Jinlin Li\*

*Key Laboratory of Catalysis and Energy Materials Chemistry of Ministry of Education &  
Hubei Key Laboratory of Catalysis and Materials Science, South-  
Central University for Nationalities, Wuhan 430074, China*

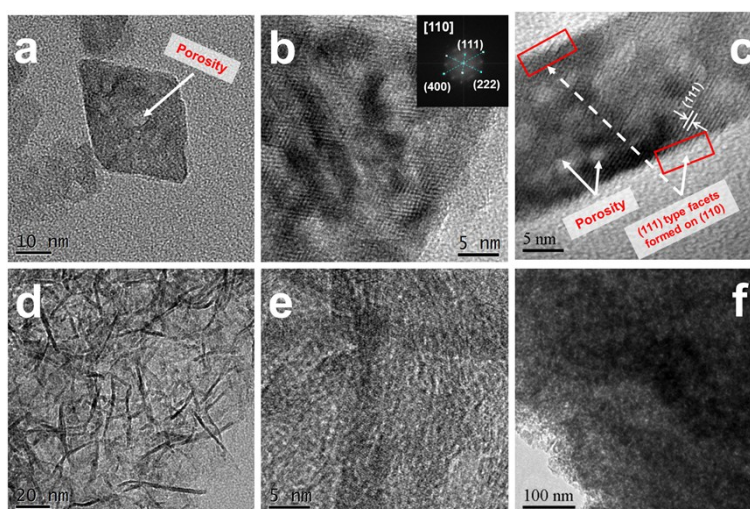

Fig. S1 TEM images of as-prepared supports: (a, b, c) Al<sub>2</sub>O<sub>3</sub>-S, (d, e) Al<sub>2</sub>O<sub>3</sub>-F and (f) Al<sub>2</sub>O<sub>3</sub>-P.

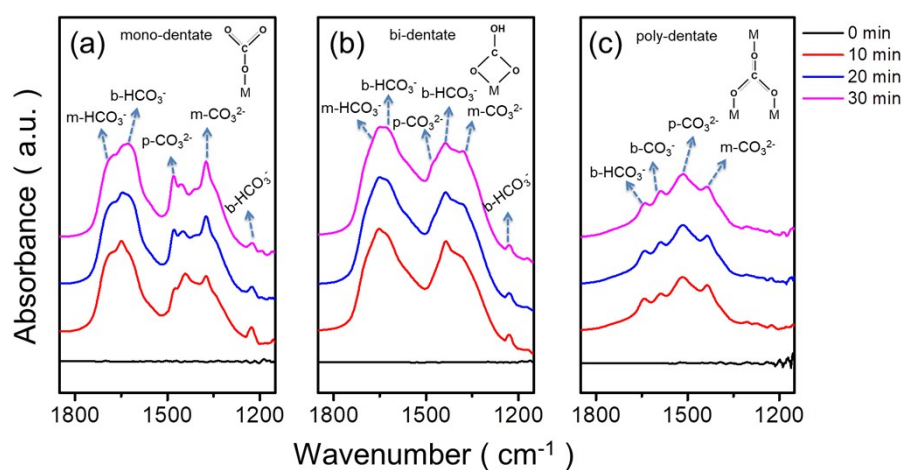

Fig. S2 In situ DRIFT spectra of CO<sub>2</sub> adsorption at 35 °C for 30 min: (a) Al<sub>2</sub>O<sub>3</sub>-S, (b) Al<sub>2</sub>O<sub>3</sub>-F and (c) Al<sub>2</sub>O<sub>3</sub>-P.

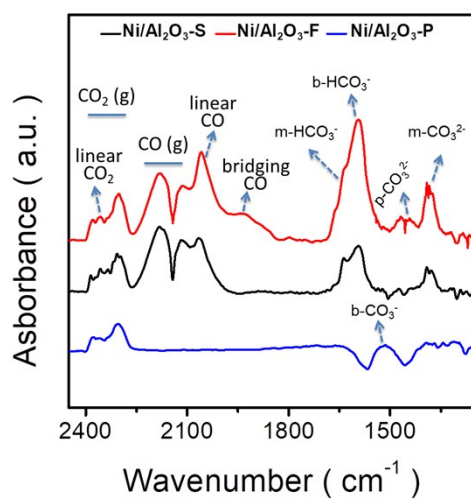

Fig. S3 In situ DRIFT spectra of CO<sub>2</sub> desorption in N<sub>2</sub> flow at 400 °C: Ni/Al<sub>2</sub>O<sub>3</sub>-S (black), Ni/Al<sub>2</sub>O<sub>3</sub>-F (red) and Ni/Al<sub>2</sub>O<sub>3</sub>-P (blue). CO<sub>2</sub> was adsorbed at 400 °C for 30 min before desorption process.
